# Supplementary material for: Formulation of a mapping formula to estimate well-being utility from the clinical subjective well-being scales
Source: Research Square preprint supplement (doi:10.21203/rs.3.rs-1394690/v1), 2022-02-28
Supplement: Supplementary file 1 [file cd4d4e426f4043d860659622.xlsx]

## Sheet: Table1
	Table1: Characteristics of our sample
			Total sample (n=515)	Estimation sample (n=300)	Validation sample (n=215)
	Age	mean (SD)	44.05 (11.55)	43.96 (11.32)	44.19 (11.9)
	Sex	male/female	218 / 297	130 / 170	88 / 127
	ICECAP	mean (SD)	0.62(0.21)	0.62(0.21)	0.62(0.20)
		min. - max.	0.00 - 1.00	0.00 - 1.00	0.00 - 1.00
	SWLS	mean (SD)	19.74(7.08)	19.69(6.99)	19.82(7.22)
		min. - max.	5.00 - 35.00	5.00 - 35.00	5.00 - 35.00
	FS	mean (SD)	32.81(9.31)	32.41(9.39)	33.37(9.18)
		min. - max.	8.00 - 56.00	8.00 - 56.00	8.00 - 56.00
	SPANEーP	mean (SD)	19.23(5.25)	19.34(5.31)	19.09(5.18)
		min. - max.	6.00 - 30.00	6.00 - 30.00	6.00 - 30.00
	SPANEーN	mean (SD)	18.26(4.74)	18.13(4.76)	18.44(4.72)
		min. - max.	6.00 - 30.00	6.00 - 30.00	6.00 - 30.00
	ICECAP-A:the ICEpop CAPability measure for Adults, SWLS: the Satisfaction With Life Scale, FS: Flourishing Scale, SPANE: the Scale of Positive and Negative Experience

## Sheet: Table2
		Table2. Modeling and fitting of each model
				Estimation sample (n = 300)					Validation sample (n = 215)
		Model	Used qestionnaires	Mean (SD)	Min	Max	RMSE	MAE	Mean (SD)	Min	Max	RMSE	MAE
		1A	SWLS	0.60 (0.15)	0.26	0.88	0.17	0.13	0.60 (0.16)	0.26	0.88	0.16	0.12
		1B	FS	0.60 (0.16)	0.17	0.91	0.16	0.12	0.62 (0.16)	0.17	0.92	0.15	0.12
		1C	SPANE-P	0.61 (0.16)	0.17	0.89	0.17	0.13	0.60 (0.16)	0.17	0.9	0.15	0.12
		1D	SPANE-N	0.60 (0.10)	0.29	0.85	0.19	0.15	0.60 (0.10)	0.33	0.82	0.17	0.14
		2A	SWLS,FS	0.60 (0.17)	0.16	0.9	0.15	0.12	0.61 (0.16)	0.17	0.92	0.14	0.11
		2B	SWLS, SPANE-P	0.61 (0.17)	0.16	0.91	0.15	0.12	0.60 (0.17)	0.16	0.92	0.15	0.11
		2C	SWLS, SPANE-N	0.60 (0.16)	0.22	0.88	0.16	0.12	0.60 (0.17)	0.2	0.91	0.15	0.12
		2D	FS, SPANE-P	0.61 (0.18)	0.12	0.92	0.15	0.12	0.61 (0.17)	0.12	0.94	0.14	0.11
		2E	FS, SPANE-N	0.60 (0.17)	0.16	0.93	0.15	0.12	0.61 (0.16)	0.16	0.94	0.14	0.11
		2F	SPANE-P&N	0.61 (0.16)	0.15	0.92	0.16	0.12	0.60 (0.16)	0.15	0.93	0.14	0.11
		3A	SWLS, FS, SPANE-P	0.61 (0.18)	0.14	0.91	0.15	0.11	0.61 (0.17)	0.13	0.94	0.14	0.11
		3B	SWLS, FS, SPANE-N	0.60 (0.17)	0.16	0.92	0.15	0.12	0.61 (0.17)	0.15	0.94	0.14	0.1
		3C	SWLS, SPANE-P&N	0.61 (0.17)	0.15	0.91	0.15	0.11	0.60 (0.18)	0.14	0.94	0.14	0.11
		3D	FS, SPANE-P&N	0.61 (0.18)	0.11	0.94	0.15	0.11	0.61 (0.18)	0.12	0.95	0.14	0.11
		4A	All	0.61 (0.18)	0.13	0.93	0.15	0.11	0.60 (0.18)	0.12	0.95	0.14	0.1
		1a	SWLS	0.60 (0.17)	0.17	0.9	0.16	0.13	0.61 (0.17)	0.19	0.88	0.16	0.12
		1b	FS	0.60 (0.17)	0.17	0.92	0.16	0.12	0.61 (0.16)	0.18	0.91	0.15	0.12
		1c	SPANE-P	0.61 (0.17)	0.17	0.89	0.17	0.13	0.59 (0.16)	0.17	0.9	0.16	0.12
		1d	SPANE-N	0.60 (0.12)	0.3	0.87	0.18	0.14	0.60 (0.11)	0.29	0.86	0.18	0.14
		2a	SWLS,FS	0.60 (0.19)	0.11	0.93	0.15	0.12	0.61 (0.18)	0.17	0.91	0.15	0.11
		2b	SWLS, SPANE-P	0.61 (0.18)	0.1	0.93	0.15	0.12	0.60 (0.19)	0.13	0.91	0.15	0.12
		2c	SWLS, SPANE-N	0.60 (0.17)	0.14	0.9	0.16	0.12	0.61 (0.18)	0.17	0.89	0.15	0.12
		2s	FS, SPANE-P	0.61 (0.18)	0.13	0.93	0.15	0.12	0.60 (0.18)	0.13	0.93	0.15	0.11
		2e	FS, SPANE-N	0.60 (0.18)	0.14	0.95	0.15	0.11	0.61 (0.17)	0.15	0.93	0.15	0.11
		2f	SPANE-P&N	0.61 (0.17)	0.15	0.92	0.16	0.12	0.59 (0.17)	0.14	0.93	0.15	0.12
		3a	SWLS, FS, SPANE-P	0.61 (0.19)	0.09	0.94	0.15	0.11	0.60 (0.19)	0.14	0.92	0.15	0.11
		3b	SWLS, FS, SPANE-N	0.60 (0.19)	0.11	0.94	0.15	0.11	0.61 (0.19)	0.1	0.92	0.15	0.12
		3c	SWLS, SPANE-P&N	0.61 (0.19)	0.1	0.94	0.15	0.11	0.60 (0.19)	0.12	0.93	0.15	0.12
		3d	FS, SPANE-P&N	0.61 (0.19)	0.11	0.95	0.15	0.11	0.59 (0.19)	0.1	0.94	0.15	0.12
		4a	All	0.61 (0.19)	0.1	0.94	0.14	0.11	0.60 (0.20)	0.11	0.93	0.16	0.12
		ICECAP-A:the ICEpop CAPability measure for Adults, SWLS: the Satisfaction With Life Scale, FS: Flourishing Scale, SPANE: the Scale of Positive and Negative Experience, RMSE: root mean squared error, MAE: mean absolute error.

## Sheet: Table3
	Table3. Estimation of our recommended modelings
	Model	1A	1B	2F	3C	3D	4A
	RMSE*	0.16	0.15	0.14	0.14	0.14	0.14
	MAE*	0.12	0.12	0.11	0.11	0.11	0.1
	Intercept	-1.40912	-1.92891	-1.53107	-1.78087	-1.96132	-1.97687
	Age	-0.000230879	-0.00140724	0.00742054	0.0055292	0.00399195	0.0037728
	Female	-0.107041	-0.234019	-0.0920246	-0.106418	-0.171022	-0.159398
	SWLS	0.0976669	-	-	0.0463401	-	0.0230507
	FS	-	0.079833	-	-	0.0437248	0.0337217
	SPANE-P	-	-	0.129398	0.093329	0.0810135	0.0738447
	SPANE-N	-	-	-0.042312	-0.0352469	-0.0341447	-0.0327402
	ICECAP-A:the ICEpop CAPability measure for Adults, SWLS: the Satisfaction With Life Scale, FS: Flourishing Scale, SPANE: the Scale of Positive and Negative Experience, RMSE: root mean squared error, MAE: mean absolute error. *These values are estimated in validation sample. An example formula (1A) was as below. ICECAP=1/(1+exp(-(Intercept+Estimate1*Age+Estimate2*Female+Estimate3*SWLS))) =1/(1+exp…
